# Supplementary material for: Alternative Splicing in Heat Shock Protein Transcripts as a Mechanism of Cell Adaptation in Trichophyton rubrum
Source: MDPI journal article supplement (doi:10.3390/cells8101206), 2019-10-05
Supplement: s1 [file s1]

**Table S1.** Read counts in intron regions of HSP genes after *T. rubrum* exposure to UDA.

| Gene ID    | Intron   | Putative annotation | 0h   | 3h UDA | 12h UDA |
|------------|----------|---------------------|------|--------|---------|
| TERG_01883 | Intron-1 | hsp75-like protein  | 3390 | 0      | 15      |
| TERG_03206 | Intron-1 | hsp7-like protein   | 2748 | 0      | 42      |

\*Data described by Mendes et al (2018).

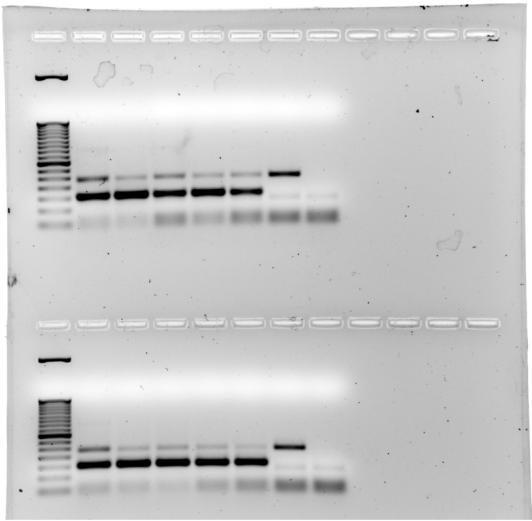

**Figure S1.** Full-length gel concerning Figure 2.

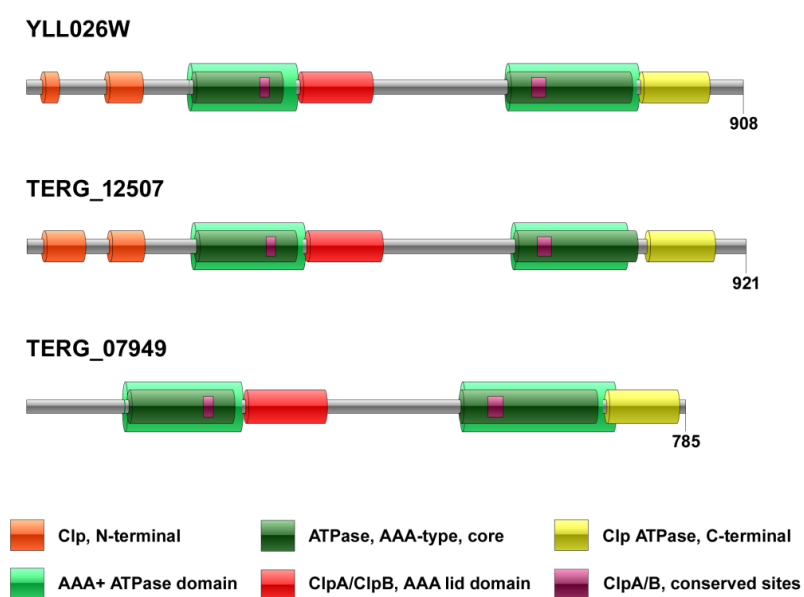

**Figure S2.** Schematic representation of TERG\_07949 and TERG\_012507 proteins in comparison to the Hsp104 found in *Saccharomyces cerevisiae* (YLL026W). Conserved sites and domains are indicated in the structure of the proteins. *T. rubrum* sequences can be considered as paralogs, and orthologous to the *Hsp104* gene in *S. cerevisiae*.

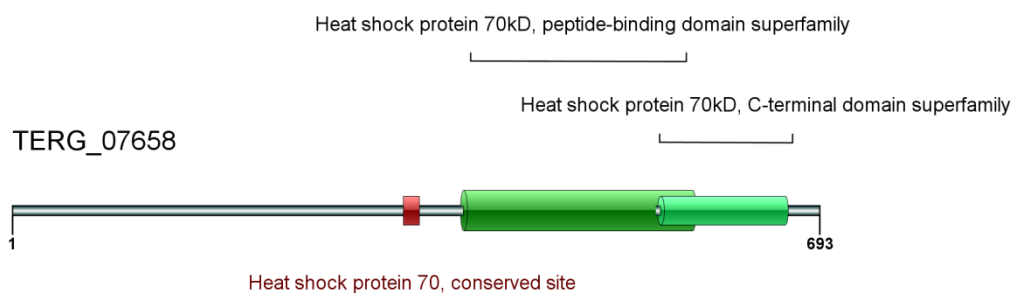

**Figure S3.** Schematic representation of TERG\_07658 protein. *In silico* analyses reveal that despite identified as *hsp88*, this gene actually belongs to the Hsp70 family. Conserved sites and domains are indicated in the structure.
